# Supplementary material for: The Effect of Lower Limb Combined Neuromuscular Electrical Stimulation on Skeletal Muscle Signaling for Glucose Utilization, Myofiber Distribution, and Metabolic Function after Spinal Cord Injury
Source: MDPI journal article supplement (doi:10.3390/ijerph20206958), 2023-10-21

# Supplemental Information: Western Blots

Glucose transporter type 4 (GLUT4) – 48 kD

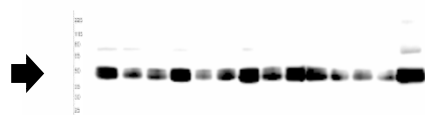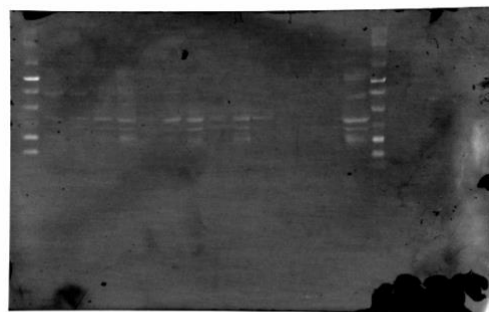

Gel 1 and 2, 4-12% Bis-Tris

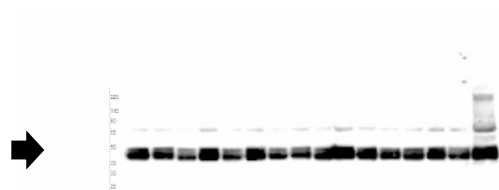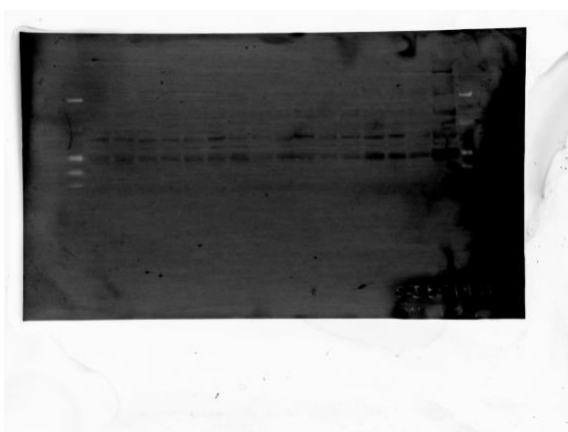

AMP-activated protein kinase, subunit alpha (AMPK- $\alpha$ ) – 62 kD

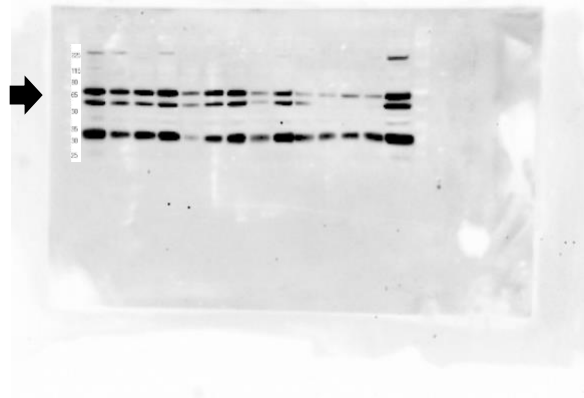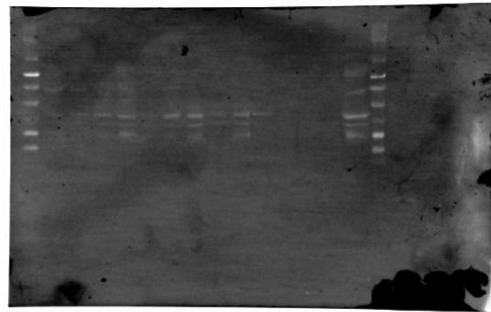

Gel 1 and 2, 4-12% Bis-Tris

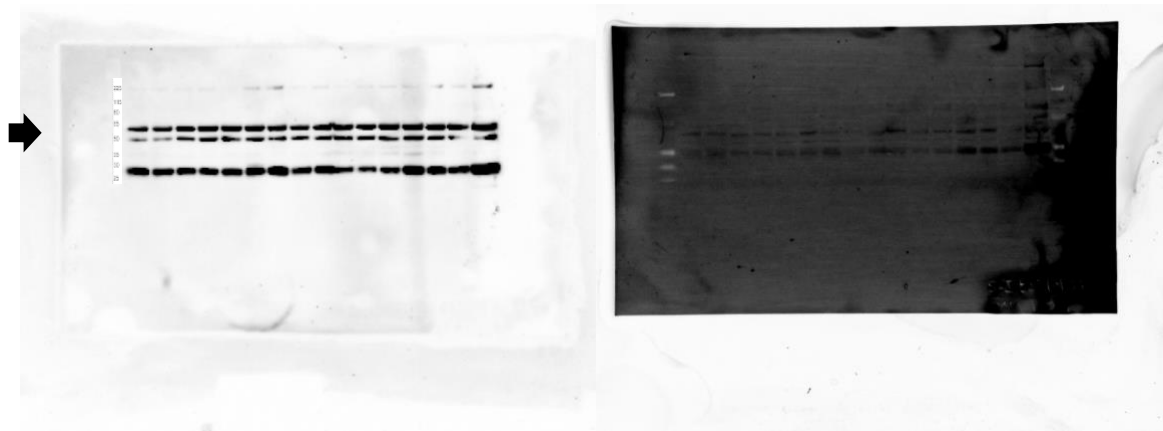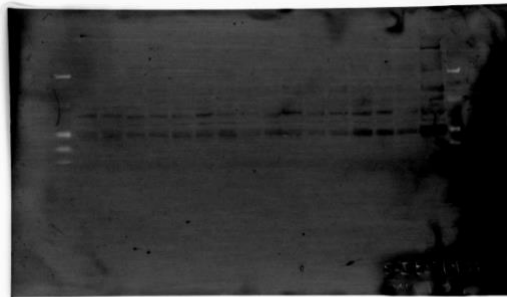

phosphorylated AMP-activated protein kinase, subunit alpha (Thr172)  
(p-AMPK- $\alpha$  Thr172) – 62 kD

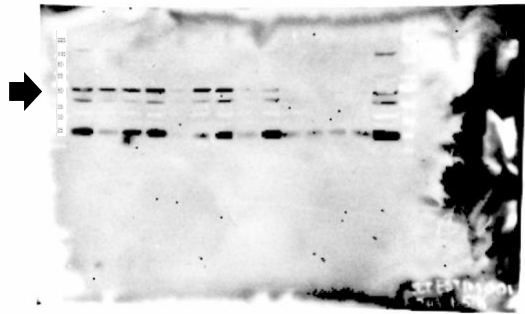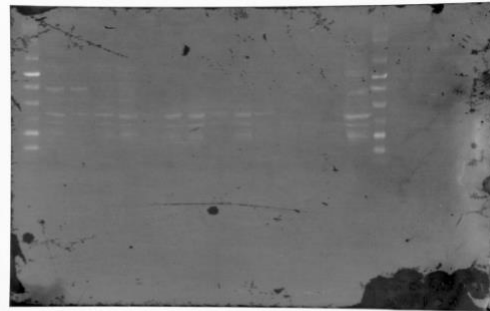

Gel 1 and 2, 4-12% Bis-Tris

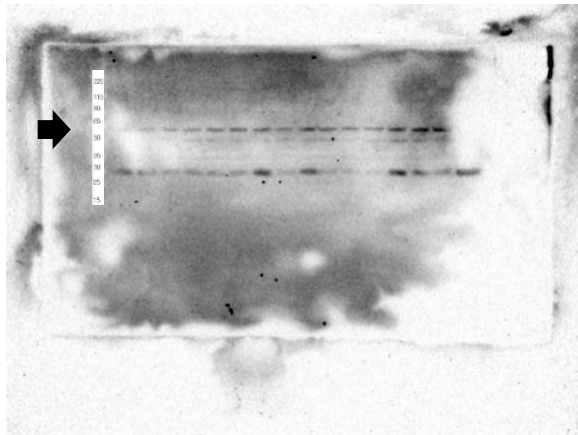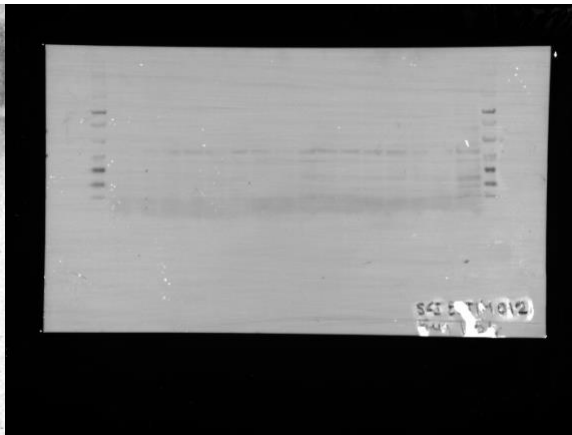

## Calcium-calmodulin (CaM)-dependent protein kinase II (CaMKII) – 50 kD

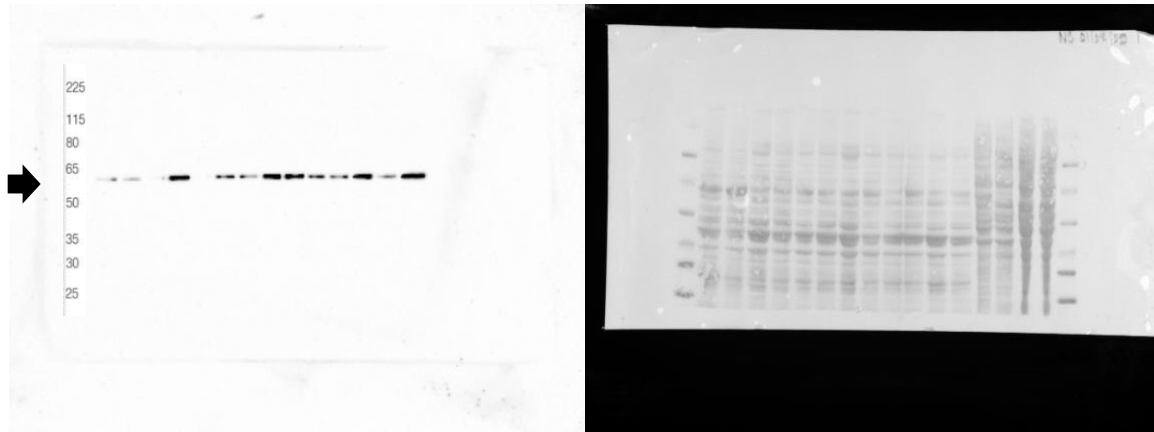

Gel 1 and 2, 4-12% Bis-Tris

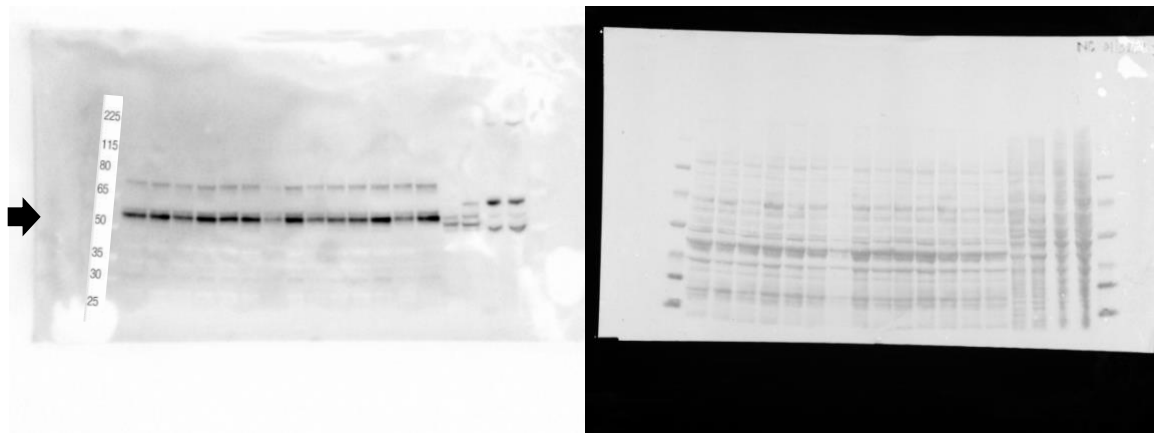

phosphorylated-Calcium-calmodulin (CaM)-dependent protein kinase II  
Thr286 (p-CaMKII Thr286) – 50 kD

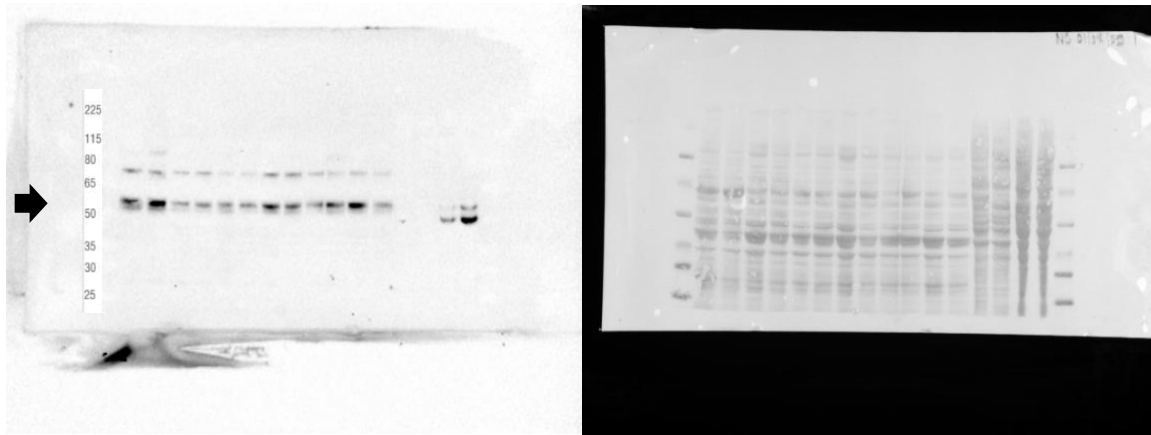

Gel 1 and 2, 4-12% Bis-Tris

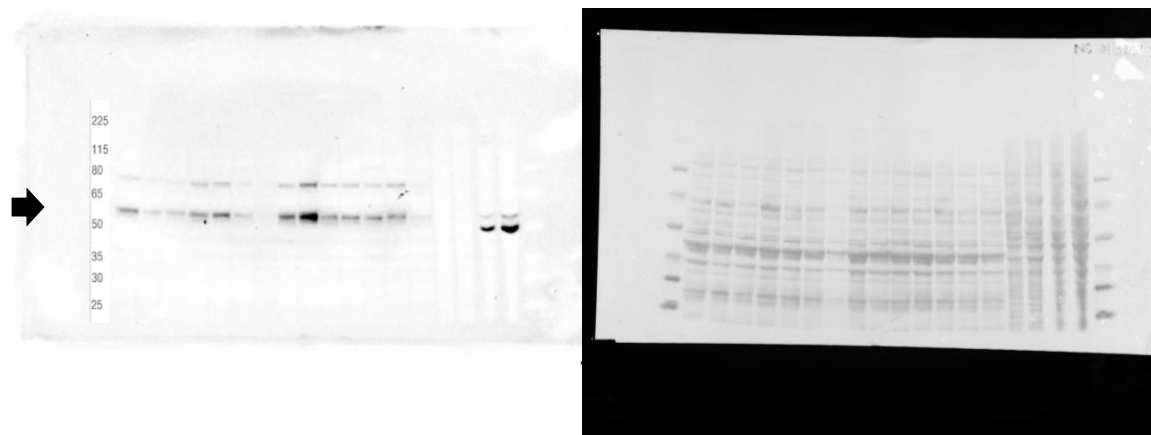

## Protein kinase B (AKT) – 60 kD

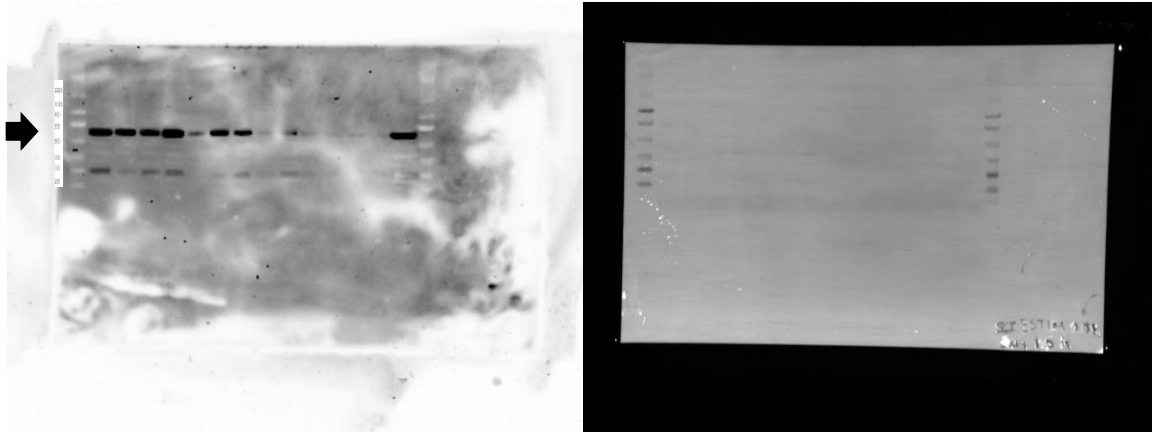

Gel 1 and 2, 4-12% Bis-Tris

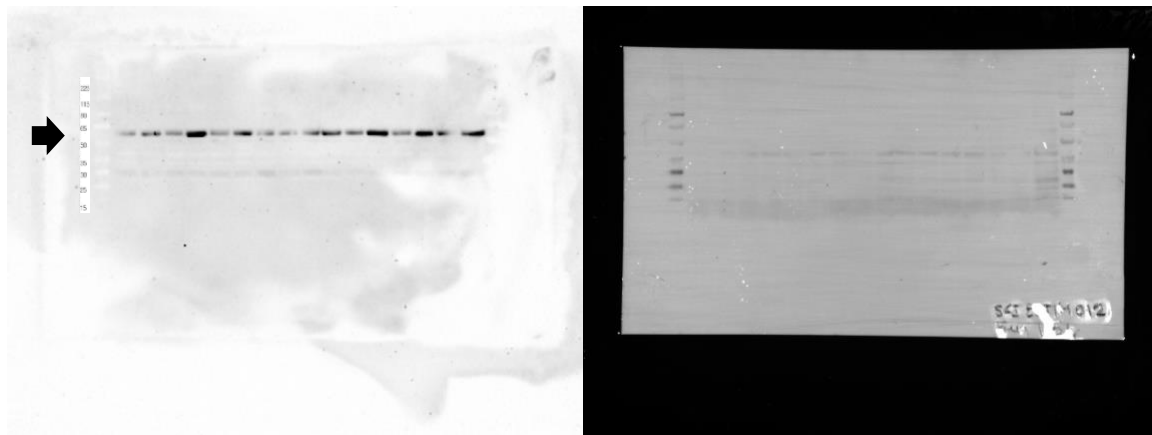

phosphorylated-Protein kinase B (AKT) Ser473 (p-AKT Ser473) – 60 kD

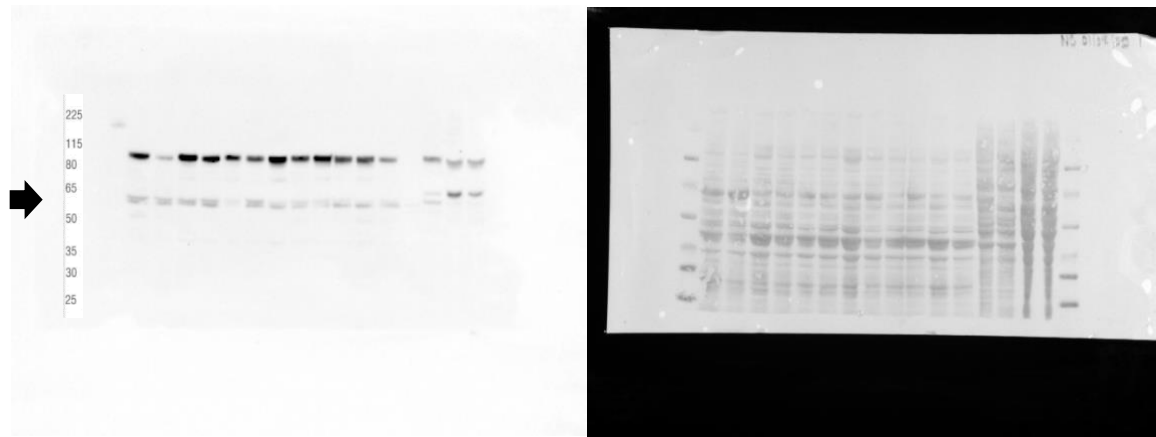

Gel 1 and 2, 4-12% Bis-Tris

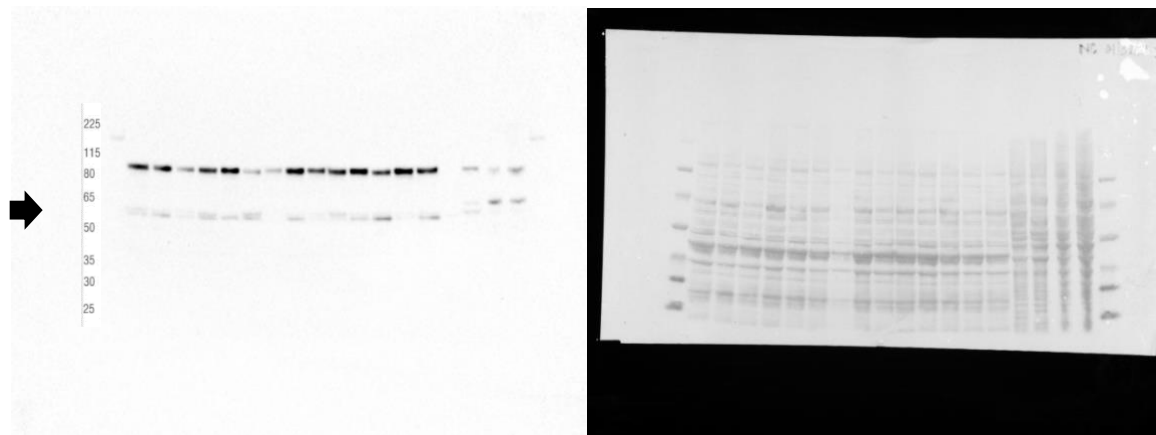

## AS160 (AKT substrate of 160 kD)

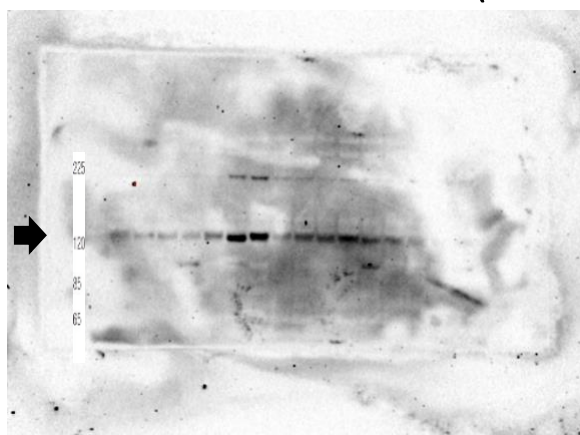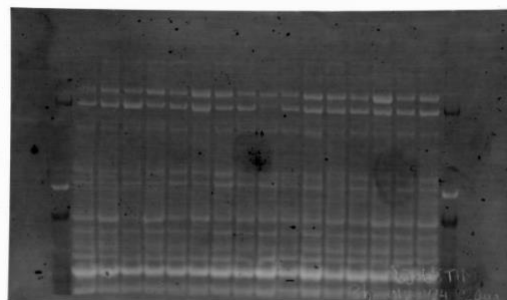

Gel 1 and 2, 3-8% Tris-Acetate

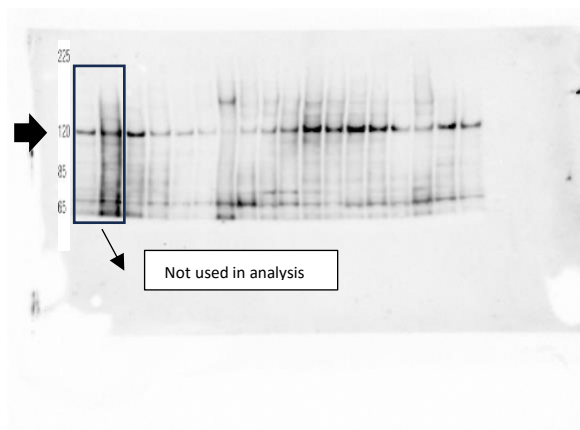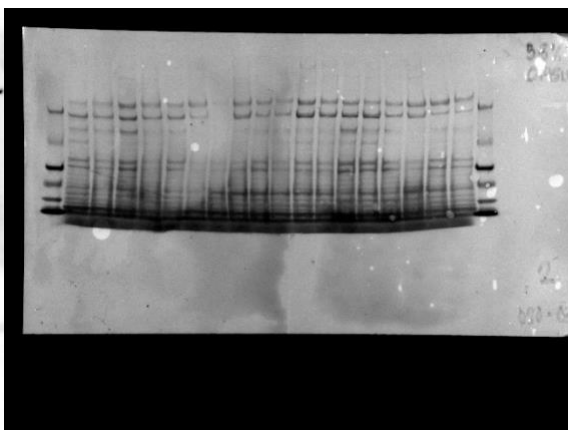



phosphorylated-AS160 Thr642 (p-AS160 Thr642) – 160 kD

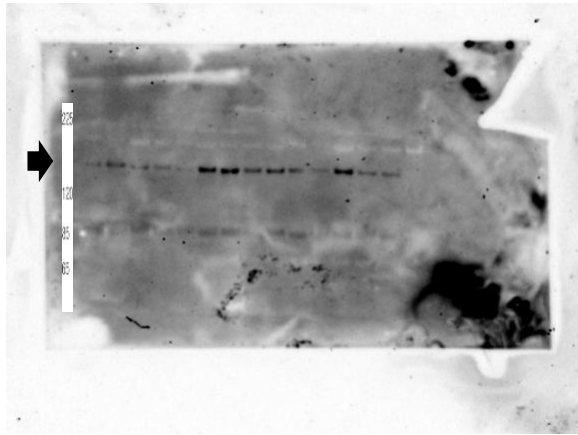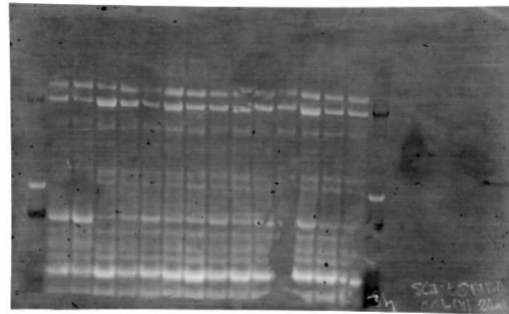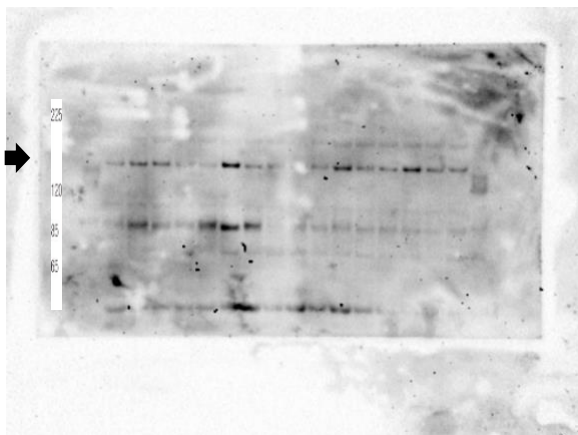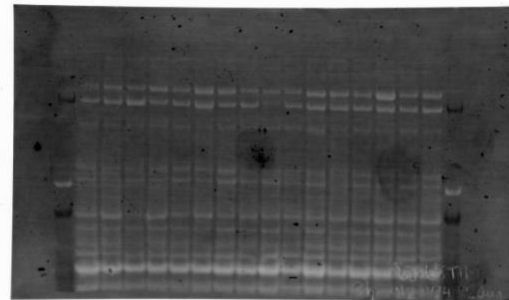

## Hexokinase II – 102 kD

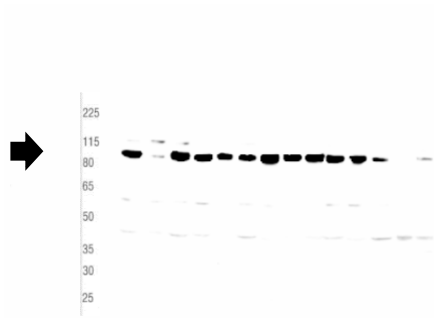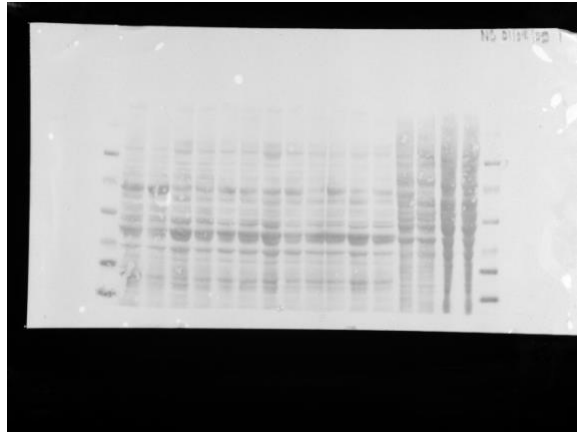

SCI-ESTIM 001-011 plus controls, 4-12% Bis-Tris

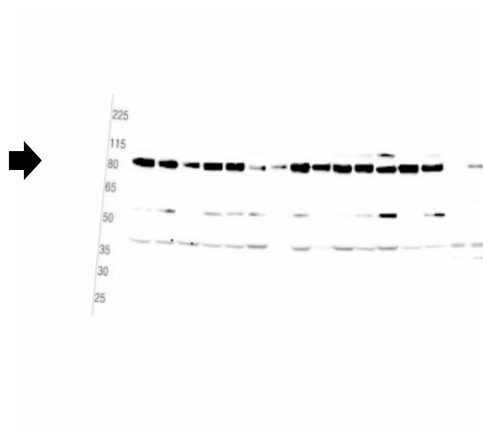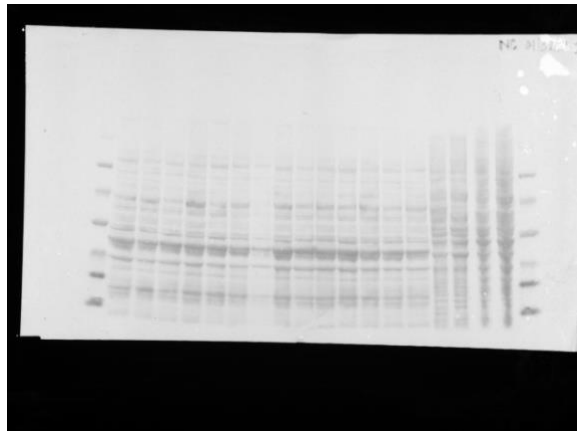

## Insulin receptor substrate 1 (IRS-1) – 180 kD

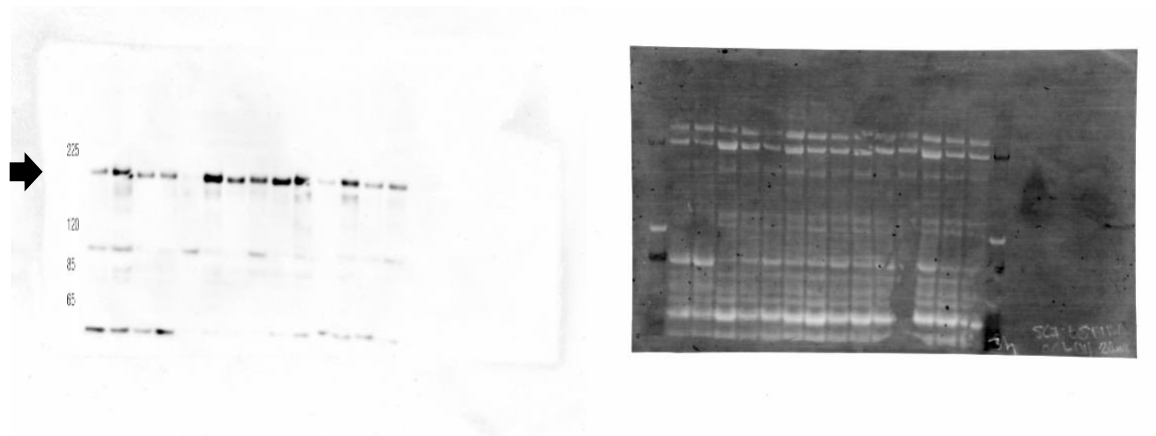

Gel 1 and 2, 3-8% Tris-Acetate

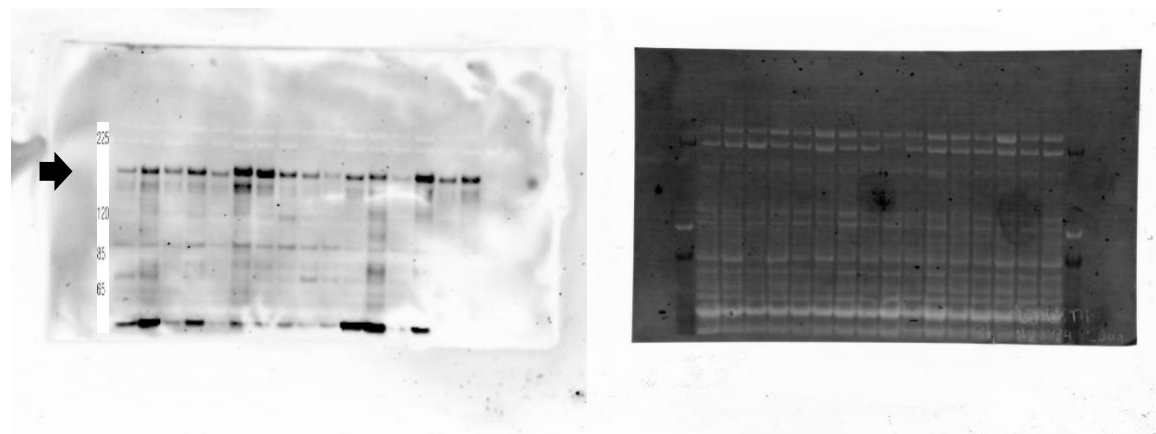

phosphorylated-Insulin receptor substrate 1 (Tyr895) (p-IRS-1 Tyr895) –  
180 kD

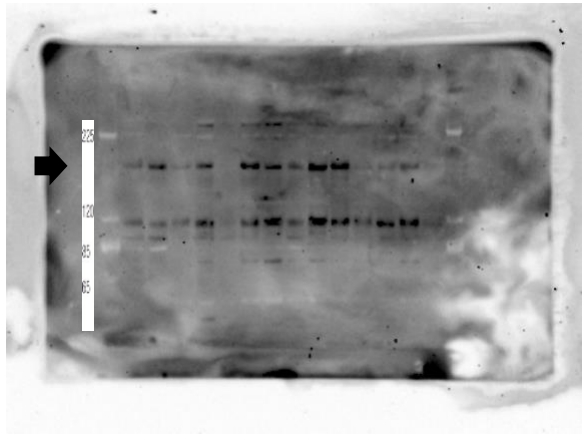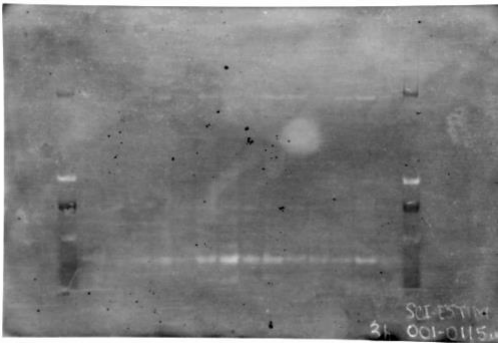

Gel 1 and 2, 3-8% Tris-Acetate

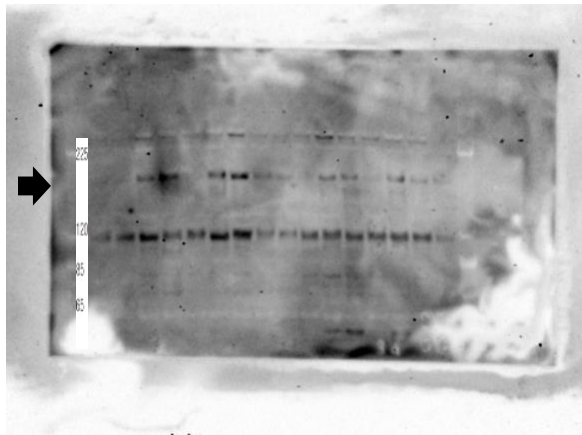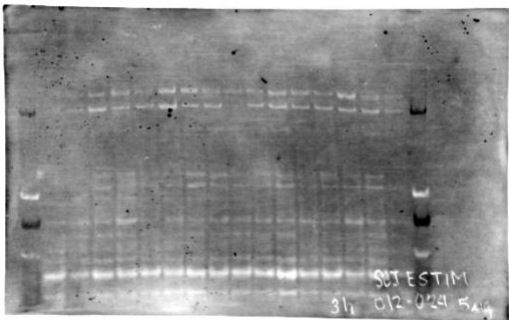

## Glycogen Synthase – 84 kD

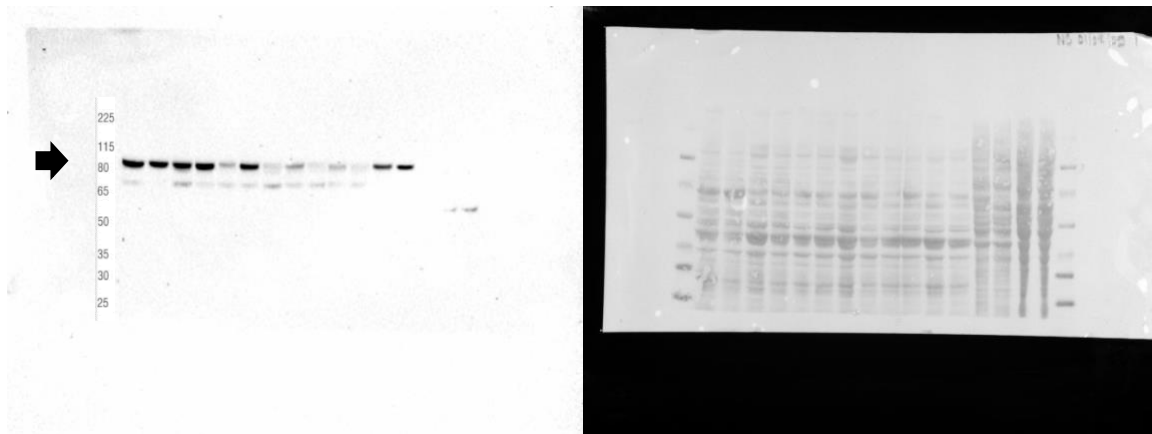

Gel 1 and 2, 4-12% Bis-Tris

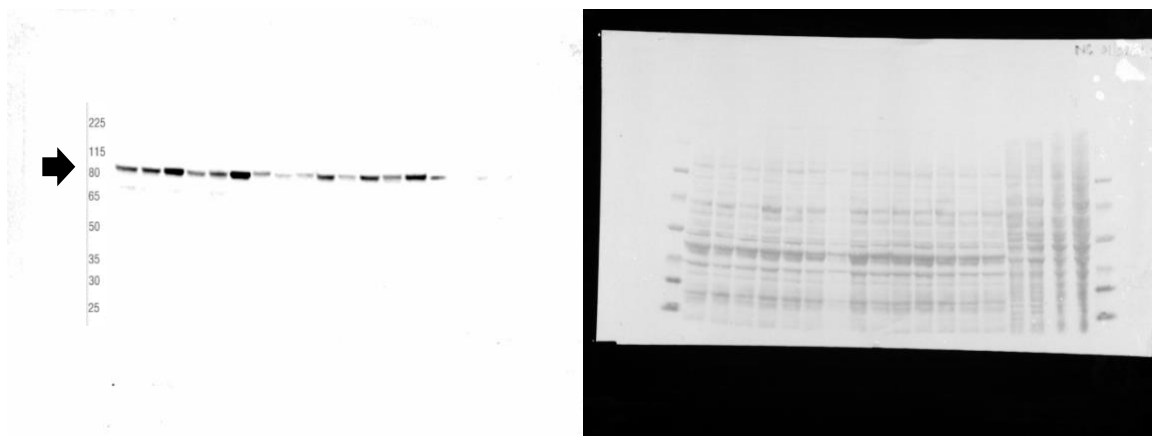

Supplement: s1 [file s1]
